# Supplementary material
Source: publisher site journal article supplement (https://www.dovepress.com/article/548616)
Supplement: Supplementary file 1 [file 548616%20Supplementary%20Table%201.docx]

**Supplementary Table 1.** Correlation analysis between the reduction rate of two factors of negative symptoms and the reduction rate of each item in positive factors and cognitive/disorganization factors

| Variables |  | Reduction rate of SA | P1 | G9 | P6 | P3 | P5 | P2 | G11 | N7 | N5 | G13 | G5 | G15 |
| --- | --- | --- | --- | --- | --- | --- | --- | --- | --- | --- | --- | --- | --- | --- |
| Reduction rate of DE | r | 0.686** | 0.377* | 0.131 | 0.208 | 0.376* | 0.229 | 0.606** | 0.399* | 0.530** | 0.560** | 0.590** | 0.191 | 0.080 |
| P | <0.001 | 0.023 | 0.447 | 0.223 | 0.024 | 0.179 | <0.001 | 0.016 | 0.001 | <0.001 | <0.001 | 0.264 | 0.644 |
| Reduction rate of SA | r |  | 0.489** | 0.205 | 0.437** | 0.341* | 0.147 | 0.482** | 0.076 | 0.310 | 0.379* | 0.498** | 0.134 | 0.209 |
| P |  | 0.002 | 0.229 | 0.008 | 0.042 | 0.393 | 0.003 | 0.658 | 0.066 | 0.023 | 0.002 | 0.436 | 0.222 |

**Notes:** ** At the 0.01 level (two-tailed), the correlation is significant. * At the 0.05 level (two-tailed), the correlation is significant. DE, Diminished expression; SA, Social amotivation.
